# Supplementary material for: Protein Digests and Pure Peptides from Chia Seed Prevented Adipogenesis and Inflammation by Inhibiting PPARγ and NF-κB Pathways in 3T3L-1 Adipocytes
Source: PubMed Central journal article supplement (PMC7826547; doi:10.3390/nu13010176), 2021-01-08
Supplement: nutrients-13-00176-s001.pdf [file nutrients-13-00176-s001.pdf]

# Protein digests and pure peptides from chia seed prevented adipogenesis and its inflammation by inhibition of PPAR $\gamma$ and NF- $\kappa$ B pathways

Mariana Grancieri, Hercia Stampini Duarte Martino and Elvira Gonzalez de Mejia

## Supplementary material

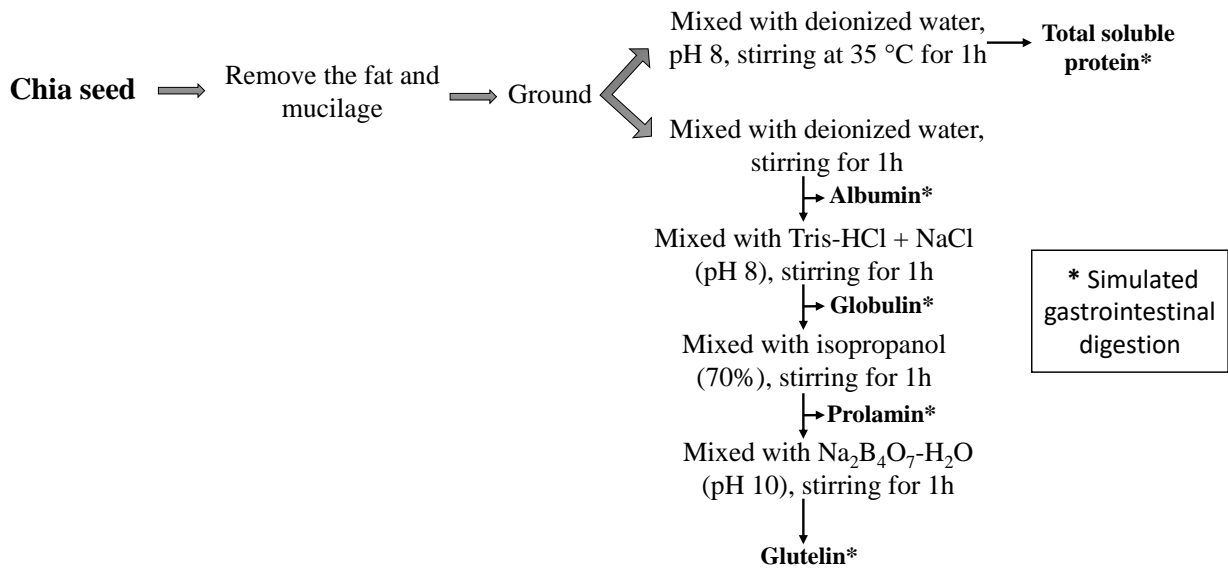

Figure S1. Samples preparation

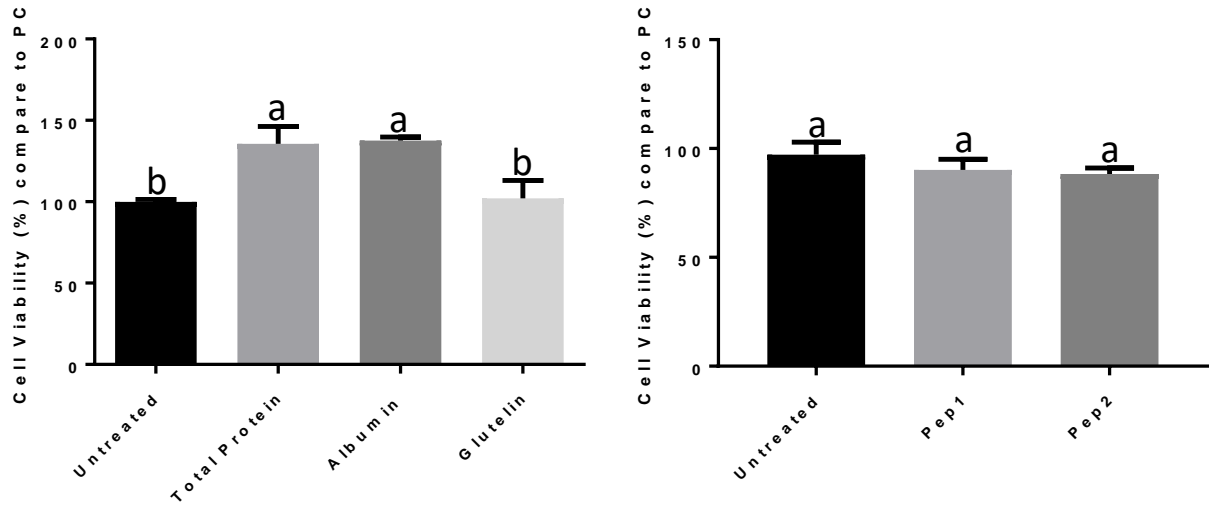

**Figure S2.** Effect of digested total protein (1 mg/ml), digested albumin and glutelin (1mg/ml) and the pure peptides Pep1 (NSPGPHDVALDQ) and Pep2 (RMVLPEYELLYE) (100 $\mu$ M) on 3T3-L1 cell viability. Analyzed by CellTiter 96 one proliferation assay kit- MTS (Promega Corporation, Madison, WI, USA).

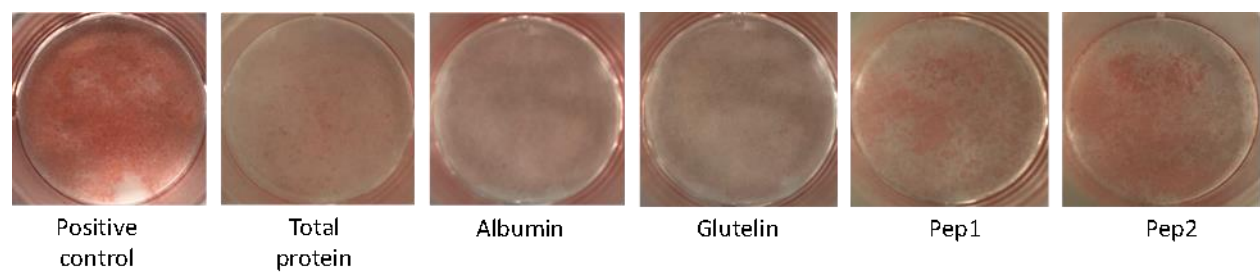

**Figure S3.** Effect of digested total protein (1 mg/ml), digested albumin and glutelin (1mg/ml) and the pure peptides Pep1 (NSPGPHDVALDQ) and Pep2 (RMVLPEYELLYE) (100 $\mu$ M) added during the differentiation of adipocytes on lipids accumulation.

**Table S1.** The effects of either digested total protein, or digested albumin, or glutelin, or pure peptides on cytokines secretion.

| Experiments                                                                                                | Cytokines | Treatment groups        |                            |                            |                         |                            |                            |                       |                       |
|------------------------------------------------------------------------------------------------------------|-----------|-------------------------|----------------------------|----------------------------|-------------------------|----------------------------|----------------------------|-----------------------|-----------------------|
|                                                                                                            |           | Untreated               | CM                         | PC                         | Total protein           | Albumin                    | Glutelin                   | Pep1                  | Pep2                  |
| Adipocytes during differentiation receiving DTP and digested albumin and glutelin<br><b>(Experiment 1)</b> | IL-6      |                         |                            | 150±15.6 <sup>a</sup>      | 149.9±5.2 <sup>a</sup>  | 121.1±4.9 <sup>ab</sup>    | 107.3±4.8 <sup>b</sup>     |                       |                       |
|                                                                                                            | IL-10     |                         |                            | 108.1±11.1 <sup>a</sup>    | 112.9±15.1 <sup>a</sup> | 110.9±15.3 <sup>a</sup>    | 104.9±5.2 <sup>a</sup>     |                       |                       |
|                                                                                                            | IL-12     |                         |                            | 72.9±4.9 <sup>a</sup>      | 81.8±2.5 <sup>a</sup>   | 72.9±4.9 <sup>a</sup>      | 72.9.9±0.1 <sup>a</sup>    |                       |                       |
| Adipocytes during differentiation receiving pure peptides<br><b>(Experiment 2)</b>                         | IL-6      |                         |                            | 10.8±0.7 <sup>a</sup>      |                         |                            |                            | 8.7±0.1 <sup>b</sup>  | 7.1±0.7 <sup>b</sup>  |
|                                                                                                            | IL-10     |                         |                            | 35.1±2.4 <sup>a</sup>      |                         |                            |                            | 31.6±1.3 <sup>b</sup> | 29.5±1.5 <sup>b</sup> |
|                                                                                                            | IL-12     |                         |                            | 13.5±0.8 <sup>a</sup>      |                         |                            |                            | 13.5±0.1 <sup>a</sup> | 12.6±0.8 <sup>a</sup> |
| Inflammation prevention in mature adipocytes stimulated with CM<br><b>(Experiment 3)</b>                   | IL-6      | 154.6±52.3 <sup>c</sup> | 24197±677 <sup>a</sup>     | 8721±1161.7 <sup>b</sup>   | 8462±1392 <sup>b</sup>  | 7330.6±2774.8 <sup>b</sup> | 7871.3±1551 <sup>b</sup>   |                       |                       |
|                                                                                                            | IL-10     | 30.1±0.5 <sup>b</sup>   | 156.4±8.3 <sup>a</sup>     | 24.4±0.5 <sup>b</sup>      | 26.2±1 <sup>b</sup>     | 27.2±0.5 <sup>b</sup>      | 28.7±2.5 <sup>b</sup>      |                       |                       |
|                                                                                                            | IL-12     | 85.4±2.6 <sup>a</sup>   | 71.2±2.5 <sup>a</sup>      | 76.5±5 <sup>a</sup>        | 87.3±5.2 <sup>a</sup>   | 81.6±7.6 <sup>a</sup>      | 91±0.1 <sup>a</sup>        |                       |                       |
| Inflammation inhibition in mature adipocytes stimulated with CM<br><b>(Experiment 4)</b>                   | IL-6      | 139±10.2 <sup>a</sup>   | 23148.4±167.5 <sup>a</sup> | 10608.2±405.4 <sup>a</sup> | 8475±1048 <sup>a</sup>  | 8479.8±1339.7 <sup>a</sup> | 8579.3±1117.5 <sup>a</sup> |                       |                       |
|                                                                                                            | IL-10     | 30.1±0.5 <sup>b</sup>   | 156.4±8.4 <sup>a</sup>     | 33.1±1.6 <sup>b</sup>      | 36.5±3.3 <sup>b</sup>   | 29.4±0.5 <sup>b</sup>      | 32.3±0.5 <sup>b</sup>      |                       |                       |
|                                                                                                            | IL-12     | 85.4±2.6 <sup>b</sup>   | 71.2±2.5 <sup>b</sup>      | 121.9±11.3 <sup>a</sup>    | 138.1±0.1 <sup>a</sup>  | 119.8±8.4 <sup>a</sup>     | 127.8±2.9 <sup>a</sup>     |                       |                       |

**Experiment 1:** Effects of digested total protein (DTP) and digested protein fraction (DPF) in 3T3-L1 adipocytes during the differentiation process. **Experiment 2:** Effects of pure peptides NSPGPHDVALDQ (Pep1) and RMVLPEYELLYE (Pep2) in 3T3-L1 adipocytes during the differentiation process. **Experiment 3:** Effects of DTP and DPF for prevent of inflammation in mature adipocytes stimulated with conditioned media from inflamed macrophages. **Experiment 4:** Effects of DTP and DPF for inhibition of inflammation in mature adipocytes stimulated with conditioned media from inflamed macrophages. Different letter per row means statistically different between the proteins (by ANOVA and post-hoc Tukey-test). CM: conditioned media; PC: Positive control

**Table S2.** Estimated free energy binding (EFE) and chemical interactions among the peptides present in digested total protein and digested albumin and glutelin from chia seeds.

| Peptides                 | PPAR $\gamma$ |                                                                                                                                                                                                | MAGL |                                                                                                                                                           | FAS  |                                                                                                                                                                         |
|--------------------------|---------------|------------------------------------------------------------------------------------------------------------------------------------------------------------------------------------------------|------|-----------------------------------------------------------------------------------------------------------------------------------------------------------|------|-------------------------------------------------------------------------------------------------------------------------------------------------------------------------|
|                          | EFE           | Interacting amino acid residues                                                                                                                                                                | EFE  | Interacting amino acid residues                                                                                                                           | EFE  | Interacting amino acid residues                                                                                                                                         |
| Pharmacological control* | -8.5          | GLU A: 295; PHE A: 226; ALA A: 292; ILE A: 325; ILE A: 296; ILE A: 326; MET A: 329; GLY A: 344; LEU A: 228; GLU A: 343; SER A: 342; LEU A: 340; ILE A: 341; LEU A: 333; LEU A: 330; ARG A: 288 | -7.4 | HIS B: 2475; SER B: 2473; MET B: 2444; SER B: 2500; SER B: 2499; PRO B: 2504                                                                              | -5.5 | ALA A: 2276; HIS B: 2283; GLN B: 2432; THR B: 2434; SER B: 2281; LEU A: 2279; TYR A: 2425; PHE A: 2418; ARG A: 2421; ARG A: 2275                                        |
| Total Protein            |               |                                                                                                                                                                                                |      |                                                                                                                                                           |      |                                                                                                                                                                         |
| HYGGPPGGCR               | -7.0          | ARG A: 280; ARG A: 288; GLU A: 343; GLU A: 295; GLU A: 298; SER A: 225                                                                                                                         | -7.5 | ASN A: 215; GLN A: 212; ALA A: 163; ILE A: 211; ALA A: 151; LYS A: 160; VAL A: 217; ALA A: 156; MET A: 123; SER A: 122; HIS A: 269                        | -8.3 | LEU A: 2231; THR A: 2230; TYR A: 2288; LYS B: 2436; LEU A: 2279; SER B: 2281; SER B: 2284; ASP B: 2280; ARG A: 2275                                                     |
| SPPHGAGLGGGMT            | -6.3          | ASN A: 375; ARG A: 234; THR A: 238; HIS A: 425; LEU A: 377; SER A: 428; LYS A: 434; LYS A: 373; ALA A: 376                                                                                     | -6.7 | LYS A: 160; PRO A: 153; ALA A: 151; ALA A: 156; SER A: 176; SER A: 155; LEU A: 184; SER A: 241; ILE A: 179; ALA A: 51                                     | -6.8 | PHE A: 2418; ARG A: 2421; SER A: 2422; ALA A: 2277; ARG A: 2275; LYS B: 2436; SER B: 2284; TYR A: 2288; CYS A: 2292; GLN B: 2432; GLU A: 2227; TYR A: 2425; ALA B: 2287 |
| LPVFGLAAEGNVVTYLH        | -7.7          | GLU A: 427; ASP A: 380; ALA A: 231; TYR A: 219; ILE A: 223; PRO A: 227; SER A: 225                                                                                                             | -6.0 | LYS A: 206; PRO A: 172; VAL A: 170; CYS A: 208; LEU A: 167; ALA A: 164; LYS A: 160; SER A: 218; ARG A: 222; ARG A: 219; ASN A: 215; GLN A: 212; SER A: 91 | -5.9 | LYS B: 2436; HIS B: 2283; THR B: 2434; ARG A: 2421; THR A: 2230; PRO A: 2229; ARG A: 2275; GLU A: 2227; TYR A: 2288; CYS A: 2292; ALA A: 2276                           |

|                    |      |                                                                                                                                                                                          |      |                                                                                                                                                                             |      |                                                                                                                                                                                                                                                               |
|--------------------|------|------------------------------------------------------------------------------------------------------------------------------------------------------------------------------------------|------|-----------------------------------------------------------------------------------------------------------------------------------------------------------------------------|------|---------------------------------------------------------------------------------------------------------------------------------------------------------------------------------------------------------------------------------------------------------------|
| TPPGVGGFPWGGAMLGAQ | -7.0 | ASN A: 424; GLU A: 427;<br>SER A: 382; GLN A: 420; LYS<br>A: 216; ARG A: 212; ALA A:<br>231; ALA A: 235; TYR A: 219                                                                      | -5.8 | SER A: 91; ASP A: 92;<br>ASP A: 26; LEU A: 167;<br>ASN A: 168; ALA A: 164;<br>ALA A: 163; ILE A: 211;<br>LEU A: 214; LYS A: 160;<br>SER A: 218; GLN A: 212                  | -5.3 | PRO A: 2229; LEU A: 2231; CYS<br>A: 2292; GLN A: 2295; ASP A:<br>2291; ALA A: 2276; ARG A: 2275;<br>PRO A: 2278; ASP B: 2280; SER B:<br>2281; LYS B: 2436; ARG A: 2421;<br>LEU A: 2279; TYR A: 2425; HIS B:<br>2283; GLU B: 2316; SER A: 2284;<br>HIS A: 2283 |
| APSPPVLGPP         | -7.1 | GLU A: 295; SER A: 225; PHE<br>A: 287; HIS A: 466; GLN A:<br>294; THR A: 297                                                                                                             | -6.2 | ALA A: 164; LYS A: 160;<br>LEU A: 214; ASN A: 215;<br>ILE A: 211; GLN A: 212;<br>SER A: 91                                                                                  | -9.8 | TYR A: 2269; THR A: 2230; LEU<br>A: 2231; TYR A: 2288; ARG A:<br>2275; GLN B: 2432; HIS B: 2283;<br>ARG A: 2421; PHE A: 2418; SER<br>A: 2281; SER B: 2284; TYR A:<br>2425                                                                                     |
| NPGGGAPSGH         | -5.9 | ARG A: 288; GLU A: 295;<br>ALA A: 292; ILE A: 326; MET<br>A: 329; LEU A: 228                                                                                                             | -6.8 | ALA A: 51; MET A: 123;<br>SER A: 122; CYS A: 242;<br>LEU A: 241; LEU A: 205;<br>ILE A: 179; SER A: 176;<br>PHE A: 159                                                       | -5.2 | ALA A: 2361; GLU A: 2364; TYR<br>A: 2424                                                                                                                                                                                                                      |
| LHNGGPGGEY         | -7.1 | LEU A: 228; MET A: 329;<br>ALA A: 292; GLU A: 295;<br>ARG A: 288; ILE A: 326; MET<br>A: 348; ILE A: 341; CYS A:<br>285; SER A: 342; GLN A: 294;<br>HIS A: 466; PHE A: 287; VAL<br>A: 290 | -7.2 | HIS A: 121; HIS A: 269;<br>MET A: 123; SER A: 122;<br>SER A: 155; ALA A: 151;<br>SER A: 218; LYS A: 160                                                                     | -6.7 | PRO A: 2229; CYS A: 2292; ARG<br>A: 2275; TYR B: 2433; GLN B:<br>2432; SER B: 2281; ARG A: 2421;<br>HIS B: 2283; ASP A: 2280; GLN B:<br>2320; TYR A: 2425; LEU A: 2279                                                                                        |
| DVNPGGPAPHPWLSVNDL | -7.4 | ALA A: 213; HIS A: 217; GLY<br>A: 305; PRO A: 304; SER A:<br>302; GLU A: 295; ILE A: 223;<br>PRO A: 227; LYS A: 232; LYS<br>A: 224; TYR A: 219; LYS A:<br>216; ALA A: 215                | -6.2 | VAL A: 166; VAL A: 207;<br>LEU A: 167; ASN A: 168;<br>CYS A: 208; LYS A: 160;<br>LEU A: 150; ALA A: 156;<br>VAL A: 217; ILE A: 211;<br>ALA A: 164; GLN A: 212;<br>SER A: 91 | 5.1  |                                                                                                                                                                                                                                                               |
| TGPPRPALVFPHAVVP   | -5.7 | ILE A: 223; ASP A: 220; LYS<br>A: 216; ARG A: 212; TYR A:<br>219; LYS A: 232; ILE A: 236;<br>ALA A: 235                                                                                  | -4.9 | LEU A: 214; ASN A: 215;<br>LYS A: 160; ILE A: 211;<br>ASP A: 92; CYS A: 208;<br>LEU A: 167; ARG A: 219                                                                      | -8.2 | SER B: 2284; SER B: 2281; LYS B:<br>2436; ALA A: 2277; HIS B: 2283;<br>ARG A: 2275; GLN B: 2432; ALA<br>A: 2276; TYR A: 2288; CYS A:<br>2292; LEU A: 2231; THR A: 2230;<br>GLN A: 2272; PRO A: 2229                                                           |

|                |      |                                                                                                                                                                        |      |                                                                                                                      |      |                                                                                                                                                                                                                                          |
|----------------|------|------------------------------------------------------------------------------------------------------------------------------------------------------------------------|------|----------------------------------------------------------------------------------------------------------------------|------|------------------------------------------------------------------------------------------------------------------------------------------------------------------------------------------------------------------------------------------|
| NSSAQYSDPFLALH | -6.6 | LYS A: 232; ILE A: 223; THR A: 229; TYR A: 219; ALA A: 231; ARG A: 212; PRO A: 426; GLU A: 427; HIS A: 425; GLU A: 378; ARG A: 234; ASN A: 375; LYS A: 230; ASP A: 380 | -5.2 | LYS A: 160; SER A: 218; LEU A: 214; ARG A: 219; ARG A: 222; ASN A: 215; ASP A: 92; SER A: 91; ILE A: 211; LEU A: 167 | -3.1 | TYR B: 2288; ASP A: 2280; LEU A: 2279; SER B: 2281; ASP B: 2280; THR B: 2434; SER B: 2284; TYR A: 2425; ALA B: 2287; HIS B: 2283; LYS B: 2436; ARG A: 2275; ALA A: 2276; TYR A: 2288; CYS A: 2292; PRO A: 2229; VAL A: 2296; LEU A: 2231 |
|----------------|------|------------------------------------------------------------------------------------------------------------------------------------------------------------------------|------|----------------------------------------------------------------------------------------------------------------------|------|------------------------------------------------------------------------------------------------------------------------------------------------------------------------------------------------------------------------------------------|

Albumin

|                    |      |                                                                                                                                                            |      |                                                                                                                                                                                                                                              |      |                                                                                                                                               |
|--------------------|------|------------------------------------------------------------------------------------------------------------------------------------------------------------|------|----------------------------------------------------------------------------------------------------------------------------------------------------------------------------------------------------------------------------------------------|------|-----------------------------------------------------------------------------------------------------------------------------------------------|
| THPTGPAGAGPPMSL    | -5.7 | TYR A: 219; ILE A: 223; LYS A: 232; ALA A: 235; GLU A: 378; LYS A: 230; ARG A: 234                                                                         | -6.0 | VAL A: 207; CYS A: 208; VAL A: 89; SER A: 91; GLN A: 212; ASN A: 215; ASP A: 92; ARG A: 219; ILE A: 211; LYS A: 160; LEU A: 214; SER A: 218; ARG A: 222; GLU A: 221; VAL A: 217; LEU A: 150                                                  | -5.6 | ASP A: 2291; TYR A: 2288; CYS A: 2292; LEU A: 2231; HIS B: 2283; SER B: 2281; ARG A: 2275; LEU A: 2279; TYR A: 2425                           |
| RGSSPMAGAAGDLPGSVT | -5.8 | ASN A: 424; HIS A: 425; GLU A: 378; ALA A: 231; THR A: 241; TYR A: 219; ASP A: 380; LEU A: 379; ARG A: 234; ASN A: 375; ASN A: 335; LYS A: 336; VAL A: 372 | -5.3 | ARG A: 222; ASN A: 215; SER A: 218; ILE A: 211; ALA A: 163; GLN A: 212; SER A: 91; LEU A: 167; CYS A: 208; LYS A: 206                                                                                                                        | -2.3 | ASN A: 2225; GLN B: 2432; PRO A: 2229; ARG A: 2233                                                                                            |
| YLGHPGTAN          | -7.5 | TYR A: 219; LYS A: 216; GLN A: 420; LEU A: 423; GLU A: 378; GLU A: 427; ASN A: 335; ASN A: 375; ARG A: 234                                                 | -7.8 | GLN A: 212; ARG A: 219; ASN A: 215; ARG A: 222; SER A: 218; LYS A: 160; ALA A: 151; ALA A: 156; VAL A: 217; LEU A: 205; ILE A: 179; LEU A: 241; MET A: 123; SER A: 122; ALA A: 51; GLY A: 50; TYR A: 194; VAL A: 270; LEU A: 184; SER A: 181 | -7.5 | ASP A: 2280; LEU A: 2279; HIS B: 2283; ASP B: 2280; SER B: 2281; GLN B: 2432; ARG A: 2275; THR B: 2434; THR A: 2230                           |
| SPKDLALPPGALPPVQ   | -7.7 | THR A: 238; ARG A: 234; ALA A: 231; HIS A: 425; ASP A: 380; TYR A: 219; ILE A: 223; SER A: 225; VAL A: 307; LYS A: 301                                     | -7.3 | SER A: 91; GLN A: 212; ASN A: 215; ARG A: 219; ILE A: 211; LEU A: 167; LEU A: 171; VAL A: 166; VAL A: 170; CYS A: 208; LYS A: 206; SER A: 175; ASN A: 173                                                                                    | -7.0 | ARG A: 2275; HIS B: 2283; GLU A: 2227; ALA A: 2276; TYR A: 2288; THR A: 2230; PRO A: 2229; ASN A: 2225; LEU A: 2223; THR A: 2255; ARG A: 2233 |
| TVPLLWFRQDPTGPLNL  | -6.9 | N/A                                                                                                                                                        | -6.8 | NA                                                                                                                                                                                                                                           | 12.7 |                                                                                                                                               |

|                   |      |                                                                                                                                                |      |                                                                                                                                                                                                |      |                                                                                                                                                                                                                |
|-------------------|------|------------------------------------------------------------------------------------------------------------------------------------------------|------|------------------------------------------------------------------------------------------------------------------------------------------------------------------------------------------------|------|----------------------------------------------------------------------------------------------------------------------------------------------------------------------------------------------------------------|
| TGPSPTAGPPAPGGGTH | -9.1 | ARG A: 234; LYS A: 230; ALA A: 231; ASP A: 380; ASP A: 381; TYR A: 219; HIS A: 425; GLU A: 378                                                 | -7.7 | NA                                                                                                                                                                                             | 9.7  |                                                                                                                                                                                                                |
| AVLPDLTSSSLKLDK   | -6.2 | ARG A: 234; TYR A: 219; THR A: 241; ALA A: 231; LYS A: 232; ILE A: 223; PRO A: 227; LYS A: 224; SER A: 225                                     | -5.7 | ARG A: 219; ASN A: 215; SER A: 218; LYS A: 160; ILE A: 211; ALA A: 163; LEU A: 167; VAL A: 207; CYS A: 208; LEU A: 174                                                                         | -3.7 | PRO A: 2229; LEU A: 2231; TYR A: 2288; GLN B: 2432; THR B: 2434; SER B: 2281; TYR A: 2425; LEU A: 2279; ASP A: 2280; ARG A: 2275; HIS B: 2283; LYS B: 2436; PRO A: 2278; ARG A: 2421; GLU B: 2316; SER B: 2284 |
| RMVLPTYFSAQLE     | -6.8 | TYR A: 219; THR A: 229; ASP A: 220; ARG A: 212; SER A: 382; GLN A: 420; ASN A: 424; PRO A: 426; ALA A: 235; LYS A: 230; ARG A: 234             | -7.1 | SER A: 218; ARG A: 219; ARG A: 222; GLN A: 212; LEU A: 214; LYS A: 160; ILE A: 211; VAL A: 170; VAL A: 207; LEU A: 167; CYS A: 208; PRO A: 172; LYS A: 206; LEU A: 174; ASN A: 173; SER A: 175 | -7.1 | ARG A: 2233; MET A: 2232; PRO A: 2229; ASN A: 2225; GLN A: 2272; VAL A: 2296; LEU A: 2231; PRO A: 2278; HIS B: 2283; ARG A: 2275                                                                               |
| RHMDLPALVFT       | -8.9 | GLU A: 298; SER A: 225; PRO A: 227; SER A: 342; ARG A: 288; LEU A: 228; SER A: 289; HIS A: 323                                                 | -6.9 | LYS A: 160; ALA A: 164; ASN A: 215; GLN A: 212; CYS A: 208; VAL A: 89; LYS A: 206; ASN A: 173; PRO A: 172; LEU A: 167                                                                          | -7.0 | LYS B: 2436; THR B: 2434; HIS B: 2283; GLU A: 2227; GLY A: 2228; ARG A: 2233                                                                                                                                   |
| GPPDGPCTEGA       | -6.8 | ARG A: 212; LYS A: 216; TYR A: 219; ALA A: 235; ALA A: 231; ALA A: 376                                                                         | -5.8 | LYS A: 160; ALA A: 163; ILE A: 211; ASN A: 215; GLN A: 212; SER A: 91; CYS A: 208; VAL A: 89; GLU A: 86; LYS A: 206; VAL A: 207; LEU A: 167; VAL A: 170                                        | -8.5 | ARG A: 2421; ASP B: 2280; PHE A: 2418; ARG A: 2275; LEU A: 2279; TYR A: 2425; SER B: 2281; SER B: 2284; GLN B: 2432; THR B: 2434; ALA A: 2276; TYR A: 2288; THR A: 2230; LEU A: 2231                           |
| SGKVEELAELPDL     | -7.0 | THR A: 238; LYS A: 240; ALA A: 235; THR A: 241; TYR A: 219; SER A: 382; ASP A: 380; ALA A: 231; LYS A: 230; ARG A: 234; GLU A: 378; ASN A: 375 | -6.7 | GLU A: 86; CYS A: 208; VAL A: 170; LEU A: 167; ILE A: 211; ALA A: 163; GLN A: 212; ASN A: 215; ARG A: 219; LYS A: 160; ALA A: 156; VAL A: 217; PRO A: 153                                      | -7.2 | THR B: 2434; SER B: 2281; LYS B: 2436; ASP B: 2280; TYR A: 2425; ARG A: 2275; CYS A: 2292; THR A: 2230; LEU A: 2231; GLU A: 2227                                                                               |



|                     |      |                                                                                                                                                                                                            |      |                                                                                                                                                                       |      |                                                                                                                                                                                                                             |
|---------------------|------|------------------------------------------------------------------------------------------------------------------------------------------------------------------------------------------------------------|------|-----------------------------------------------------------------------------------------------------------------------------------------------------------------------|------|-----------------------------------------------------------------------------------------------------------------------------------------------------------------------------------------------------------------------------|
| LPGPPATF            | -6.1 | TYR A: 219; ARG A: 212; ASP A: 380; ASN A: 424; HIS A: 425; LEU A: 379; ARG A: 234; ALA A: 235; ALA A: 231; LYS A: 240; THR A: 238; LYS A: 230; ASP A: 381; SER A: 382; GLN A: 420; LYS A: 216; GLU A: 378 | -5.8 | ILE A: 211; LEU A: 214; SER A: 218; ARG A: 222; ARG A: 219; GLN A: 212; ASN A: 215                                                                                    | -9.0 | CYS A: 2292; TYR A: 2288; THR A: 2230; ALA A: 2276; LYS B: 2436; HIS B: 2283; ARG A: 2275; LEU A: 2279; PHE A: 2418; ASP B: 2280; SER B: 2281; SER B: 2284                                                                  |
| Glutelin            |      |                                                                                                                                                                                                            |      |                                                                                                                                                                       |      |                                                                                                                                                                                                                             |
| KKLELTEYLYEDKK      | -6.3 | LYS A: 301; PRO A: 227; LYS A: 232; SER A: 225; THR A: 229; LYS A: 224; ILE A: 223; TYR A: 219; ASP A: 220; ASP A: 380; ALA A: 231                                                                         | -6.0 | ALA A: 151; GLU A: 221; SER : 218; ARG A: 222; LEU A: 214; ARG A: 98; SER A: 91; LEU A: 167; VAL A: 166; VAL A: 207; CYS A: 208                                       | 16.4 |                                                                                                                                                                                                                             |
| NSPGPHDVALDQ        | -5.6 | LYS A: 230; ALA A: 235; LYS A: 232; ALA A: 231; TYR A: 219; GLU A: 378; ARG A: 234                                                                                                                         | -6.4 | ARG A: 98; ASP A: 26; SER A: 91; VAL A: 90; VAL A: 95; VAL A: 78; CYS A: 208; ILE A: 211; SER A: 218; LYS A: 160                                                      | -7.3 | GLU A: 2227; GLY A: 2228; TYR A: 2288; PRO A: 2229; CYS A: 2292; LYS B: 2436; ASP A: 2291; THR B: 2434; ARG A: 2275; ARG A: 2421; ARG B: 2428; TYR B: 2433; ILE B: 2282; HIS B: 2283; SER B: 2281; LEU A: 2279; ASP A: 2280 |
| KDSGHPNGGLFAESSP    | -6.0 | PRO A: 227; TYR A: 219; LYS A: 232; THR A: 241; ASP A: 380; LYS A: 230; ALA A: 231; ALA A: 235; LYS A: 240                                                                                                 | -6.8 | ALA A: 164; VAL A: 166; VAL A: 170; ASN A: 215; GLN A: 212; ASP A: 92; ARG A: 219; ARG A: 222; SER A: 218; GLU A: 221; ALA A: 156; ALA A: 151; VAL A: 217             | -5.2 | ARG A: 2275; ARG A: 2421; SER B: 2281; GLN B: 2432; GLU A: 2227; THR B: 2434; LYS B: 2436; PRO A: 2229; CYS A: 2292; TYR A: 2288; ALA B: 2437; PRO B: 2435                                                                  |
| TGPCNGAAPPAAGSV DCL | -6.6 | LYS A: 438; LYS A: 434; SER A: 428; GLU A: 427; ASN A: 424; TYR A: 219; THR A: 229; ALA A: 235; LYS A: 240; GLU A: 378; ASN A: 375; LYS A: 230                                                             | -5.2 | LYS A: 206; ASN A: 173; LEU A: 174; VAL A: 207; CYS A: 208; VAL A: 166; VAL A: 170; LEU A: 167; ILE A: 211; ALA : 163; ASN A: 215; LYS A: 160; SER A: 218; ARG A: 222 | -5.8 | SER A: 2253; ASN A: 2225; PRO A: 2229; CYS A: 2292; GLU A: 2227; GLN B: 2432; SER B: 2281; ARG A: 2275; PRO A: 2278; TYR A: 2425                                                                                            |
| QAGAGGPGAAGH        | -7.8 | SER A: 332; ARG A: 288; SER A: 342; SER A: 225; GLU A: 298; LYS A: 224; ASP A: 220                                                                                                                         | -6.7 | SER A: 218; ASN A: 215; LYS A: 153; ALA A: 151; MET A: 123                                                                                                            | -8.3 | THR A: 2230; THR A: 2274; ALA A: 2276; TYR A: 2288; CYS A: 2292; THR B: 2434; SER B: 2281; ARG A: 2275; GLN B: 2432; ARG A: 2421; SER B: 2284; TYR A: 2425; LYS B: 2436                                                     |

|                   |      |                                                                                                                                                                        |      |                                                                                                                                                                                                                                                            |      |                                                                                                                                                              |
|-------------------|------|------------------------------------------------------------------------------------------------------------------------------------------------------------------------|------|------------------------------------------------------------------------------------------------------------------------------------------------------------------------------------------------------------------------------------------------------------|------|--------------------------------------------------------------------------------------------------------------------------------------------------------------|
| TPPNGLGPSGSPGPHAQ | -6.0 | SER A: 225; PRO A: 227; ILE A: 223;<br>LYS A: 232; THR A: 229; TYR A: 219;<br>ALA A: 231; ARG A: 234; LYS A: 230;<br>ASP A: 380; LYS A: 240; THR A: 241;<br>ASP A: 243 | -5.3 | SER A: 91; VAL A: 89; GLN<br>A: 212; ASN A: 215; ARG A:<br>219; LEU A: 171; VAL A: 207;<br>LYS A: 206; CYS A: 208; LEU<br>A: 174; ASN A: 173; LYS A:<br>160; ALA A: 163; LEU A: 214;<br>ILE A: 211; PHE A: 159                                             | -6.0 | LEU A: 2231; VAL A: 2296;<br>ARG A: 2233; CYS A: 2292;<br>THR A: 2230; TYR A: 2288;<br>ALA A: 2276; ARG A: 2275;<br>ASP B: 2280; TYR A: 2425;<br>LEU A: 2279 |
| RMVLPEYELLYE      | -6.9 | GLN A: 420; TYR A: 219; LYS A: 224;<br>ILE A: 223; LYS A: 232; THR A: 241;<br>ALA A: 231; ARG A: 234; GLU A:<br>378; ASP A: 380; HIS A: 425                            | -7.3 | MET A: 123; SER A: 122; SER<br>A: 155; LEU A: 148; LEU A:<br>213; ALA A: 151; ALA A:<br>156; LEU A: 214; LEU A: 150;<br>PRO A: 153; SER A: 218;<br>ARG A: 222; LYS A: 160;<br>ALA A: 164; ALA A: 163; ILE<br>A: 211; LEU A: 167; CYS A:<br>208; VAL A: 207 | -5.9 | SER B: 2281; GLU A: 2227;<br>LYS B: 2436; TYR A: 2288;<br>THR A: 2230; PRO A: 2229;<br>GLN B: 2432                                                           |
| RLTGTGMGAASSVLP   | -7.7 | ILE A: 326; CYS A: 285; SER A: 342;<br>PHE A: 287; GLN A: 294; HIS A: 466;<br>LEU A: 468; LEU A: 318; THR A: 297                                                       | -6.2 | LYS A: 160; SER A: 218; THR<br>A: 157; VAL A: 217; ALA A:<br>164; CYS A: 208; GLN A: 212;<br>ASN A: 215; ARG A: 219                                                                                                                                        | -4.9 | GLN A: 2272; MET A: 2232;<br>PRO A: 2229; THR B: 2434;<br>GLU A: 2227; TYR A: 2288;<br>CYS A: 2292                                                           |
| RHMDLPLSPSSAGP    | -5.8 | GLN A: 420; ARG A: 212; LYS A: 216;<br>TYR A: 219; ASN A: 424; HIS A: 425;<br>ARG A: 234; LYS A: 230; ALA A: 231;<br>LYS A: 240; THR A: 241; THR A: 229                | -5.2 | ALA A: 163; ALA A: 164;<br>SER A: 218; LYS A: 160; LEU<br>A: 214; ILE A: 211; LEU A:<br>167; CYS A: 208; ASN A: 215;<br>GLN A: 212; ARG A: 219;<br>ARG A: 222                                                                                              | 56.9 |                                                                                                                                                              |
| TTNPGVDADFPPAREL  | -5.9 | GLU A: 298; SER A: 225; GLU A: 343;<br>PRO A: 227; LYS A: 232; ILE A: 223;<br>THR A: 229; ASP A: 381; ALA A: 231;<br>LYS A: 230; ARG A: 234; THR A: 238                | 73.2 |                                                                                                                                                                                                                                                            | -4.7 | PRO A: 2229; GLU A: 2227;<br>ALA A: 2276; THR B: 2434;<br>LYS B: 2436; CYS A: 2292;<br>THR A: 2274; THR A: 2230;<br>GLY A: 2228; GLN A: 2295                 |
| QPADPNQFVYAPDTH   | -5.5 | SER A: 429; SRG A: 443; ASP A: 396;<br>ASP A: 475                                                                                                                      | -5.6 | ARG A: 222; SER A: 218; LYS<br>A: 160; ALA A: 163; ILE A:<br>211; CYS A: 208; GLN A: 212;<br>ASN A: 215; SER A: 91                                                                                                                                         | -6.2 | GLU A: 2227; PRO A: 2229;<br>LEU A: 2231; LYS B: 2436;<br>ALA A: 2276; GLN B: 2432;<br>SER B: 2281                                                           |
| FAFFEFPELLFAFFT   | -8.5 | ARG A: 234; ALA A: 231; ASP A: 380;<br>HIS A: 425; TYR A: 219; ASP A: 220;<br>LYS A: 224; PRO A: 227                                                                   | -6.5 | LYS A: 160; ALA A: 164;<br>ALA A: 163; SER A: 218;<br>ARG A: 222; CYS A: 208;<br>LYS A: 206; ALA A: 203;<br>ARG A: 87                                                                                                                                      | 9.2  |                                                                                                                                                              |

|                    |      |                                                                                                                                                                                                                           |      |                                                                                                                                                              |      |                                                                                                                                                                                                        |
|--------------------|------|---------------------------------------------------------------------------------------------------------------------------------------------------------------------------------------------------------------------------|------|--------------------------------------------------------------------------------------------------------------------------------------------------------------|------|--------------------------------------------------------------------------------------------------------------------------------------------------------------------------------------------------------|
| TDQLGWFLGAAAFAPAGQ | -6.4 | GLU A: 298; LYS A: 224; GLN A: 294;<br>GLY A: 284; SER A: 342                                                                                                                                                             | -5.5 | CYS A: 208; VAL A: 207;<br>VAL A: 170; VAL A: 166;<br>ALA A: 163; PHE A: 159;<br>LEU A: 214; LYS A: 160; ILE<br>A: 211; ASP A: 92; GLN A:<br>212; ARG A: 219 | -4.9 | GLU A: 2415; THR A: 2255;<br>ARG A: 2233; GLU A: 2227;<br>ARG A: 2275; HIS B: 2283;<br>ARG A: 2421                                                                                                     |
| RGSSPAPSGSELVL     | -4.9 | GLN A: 420; ARG A: 212; LEU A: 423;<br>PRO A: 426; ASN A: 424; HIS A: 425;<br>GLU A: 427; LYS A: 240; GLU A: 378;<br>LYS A: 230; ASP A: 380; ALA A: 231;<br>TYR A: 219                                                    | -5.9 | PRO A: 172; ASN A: 173; ILE<br>A: 174; CYS A: 208; SER A:<br>91; ASP A: 92; GLN A: 212;<br>ARG A: 219; ARG A: 222;<br>SER A: 218; LEU A: 167; VAL<br>A: 170  | -7.2 | LEU A: 2231; PRO A: 2229;<br>GLU A: 2227; ALA A: 2276;<br>THR A: 2274; PRO A: 2226;<br>CYS A: 2292; LYS B: 2436; SER<br>B: 2281; LEU A: 2279; SER B:<br>2284; TYR A: 2425; ARG A:<br>2275; ARG A: 2421 |
| TDWYDPGAFQ         | -6.7 | ILE A: 232; TYR A: 219; LYS A: 216;<br>ASP A: 220; ILE A: 223; LYS A: 224;<br>SER A: 225; SER A: 221; TYR A: 299;<br>SER A: 302; GLU A: 298                                                                               | -7.5 | LYS A: 160; SER A: 218; ARG<br>A: 222; ARG A: 219; ASN A:<br>215; LEU A: 214; ILE A: 211;<br>GLN A: 212; ASN A: 173;<br>VAL A: 207; CYS A: 208               | -7.3 | CYS A: 2292; LEU A: 2231;<br>THR B: 2434; LYS B: 2436; HIS<br>B: 2283; TYR B: 2433; SER B:<br>2281; GLN B: 2432; ARG B:<br>2428                                                                        |
| HAPGFLSPAHR        | -6.2 | TYR A: 219; LYS A: 216; ASP A: 380;<br>ALA A: 231; ASN A: 424                                                                                                                                                             | -6.5 | SER A: 218; ALA A: 163; ILE<br>A: 211; GLN A: 212; CYS A:<br>208; LYS A: 206; LEU A: 174                                                                     | -7.5 | TYR A: 2288; CYS A: 2292;<br>LEU A: 2231; ALA A: 2276;<br>GLY A: 2228; GLU A: 2227;<br>ARG A: 2275; GLN B: 2432;<br>ASP B: 2280; SER B: 2281;<br>ARG A: 2421; LEU A: 2279;<br>SER B: 2284; TYR A: 2425 |
| LPGPPATF           | -6.1 | TYR A: 219; ARG A: 212; ASP A: 380;<br>ASN A: 424; HIS A: 425; LEU A: 379;<br>ARG A: 234; ALA A: 235; ALA A:<br>231; LYS A: 240; THR A: 238; LYS A:<br>230; ASP A: 381; SER A: 382; GLN A:<br>420; LYS A: 216; GLU A: 378 | -5.8 | ILE A: 211; LEU A: 214; SER<br>A: 218; ARG A: 222; ARG A:<br>219; GLN A: 212; ASN A: 215                                                                     | -9.0 | CYS A: 2292; TYR A: 2288;<br>THR A: 2230; ALA A: 2276;<br>LYS B: 2436; HIS B: 2283; ARG<br>A: 2275; LEU A: 2279; PHE A:<br>2418; ASP B: 2280; SER B:<br>2281; SER B: 2284                              |

EFE: Estimated free energy. Docking calculation were carried out using AutoDock Vina. Negative values mean spontaneous reaction.

\* Pharmacological control: GW9962 (2-chloro-5-nitro-N-phenylbenzamide), Orlistat, and endocannabinoid 2-arachidonoylglycerol (2-AG), respectively for PPAR $\gamma$ , FAS, and MAGL.
